# Supplementary material for: Improvement of PBAT Processability and Mechanical Performance by Blending with Pine Resin Derivatives for Injection Moulding Rigid Packaging with Enhanced Hydrophobicity
Source: MDPI journal article supplement (doi:10.3390/polym12122891), 2020-12-02
Supplement: s1 [file s1]

# Improvement of PBAT Processability and Mechanical Performance by Blending with Pine Resin Derivatives for Injection Moulding Rigid Packaging with Enhanced Hydrophobicity

Cristina Pavon <sup>1,\*</sup>, Miguel Aldas <sup>1,2</sup>, Harrison de la Rosa-Ramírez<sup>1</sup>, Juan López-Martínez <sup>1</sup>, Marina P. Arrieta <sup>3,4,\*</sup>

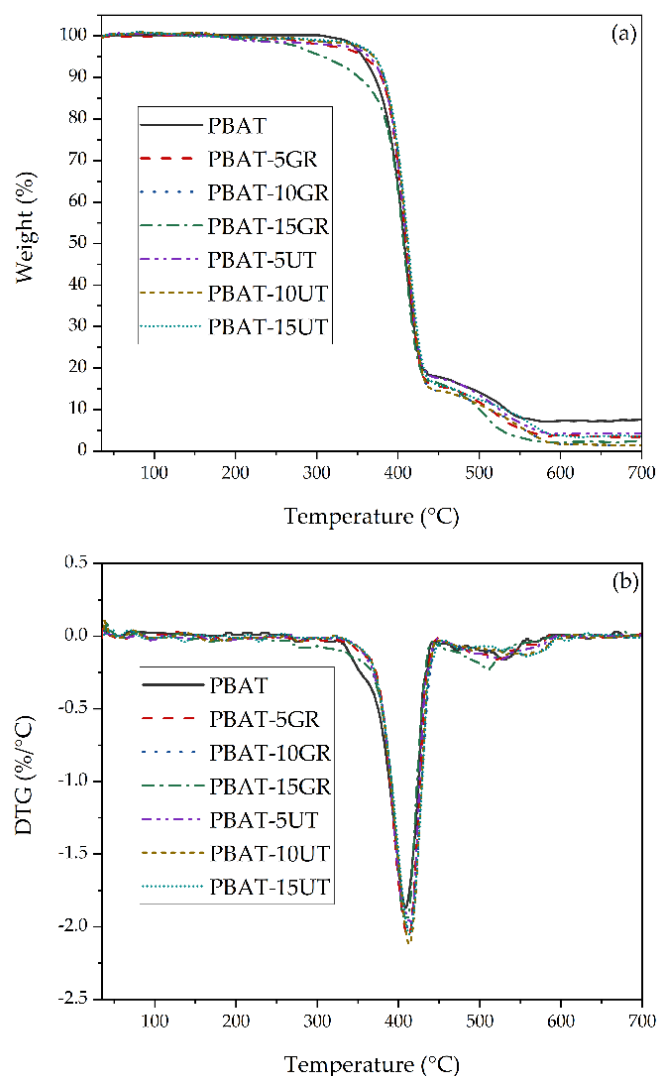

**Figure S1.** (a) TGA and (b) DTG curves of PBAT and PBAT-resin based formulations in 5, 10 and 15 wt.%
